# Supplementary material for: Interaction between a nano-formulation of atrazine and rhizosphere bacterial communities: atrazine degradation and bacterial community alterations
Source: Royal Society of Chemistry journal article supplement (doi:10.1039/d0en00638f), 2020-01-01
Supplement: d0en00638f1.pdf [file d0en00638f1.pdf]

## Supplementary information

### Interaction between a nano-formulation of atrazine and the rhizosphere bacterial community: atrazine degradation and bacterial community alterations

©Yujia Zhai, ©\*Fazel Abdolapur Monikh, ©Juan Wu, ‡Renato Grillo, †Daniel Arenas-Lago, ΩGopala Krishna Darbha, ©Martina G. Vijver, ©,¥Willie J.G.M. Peijnenburg

© Institute of Environmental Sciences (CML), Leiden University, P.O. Box 9518, 2300 RA, Leiden, The Netherlands

‡ Department of Physics and Chemistry, School of Engineering, São Paulo State University (UNESP), 15385-000, Ilha Solteira, SP, Brazil.

† Department of Plant Biology and Soil Science, University of Vigo, As Lagoas, Marcosende, 36310, Vigo, Spain

Ω Environmental Nanoscience Laboratory, Department of Earth Sciences, Indian Institute of Science Education and Research Kolkata, Kolkata, Mohanpur, West Bengal, India- 741246

¥ National Institute of Public Health and the Environment (RIVM), P.O. Box 1, Bilthoven, The Netherlands

**\*Corresponding authors:**

Fazel Abdolapur Monikh

[f.a.monikh@cml.leidenuniv.nl](mailto:f.a.monikh@cml.leidenuniv.nl)

## **S1. Nano-pesticides Synthesis**

Atrazine (ATZ) loaded poly- $\epsilon$ -caprolactone nano-capsules (NPATZ) were prepared according to the precipitation method, as described by Grillo et al. (2012)<sup>1</sup>. This method involves the mixing of an organic phase (composed of 100 mg of polymer (poly- $\epsilon$ -caprolactone), 200 mg of triglycerides of capric and caprylic acids (Myritol 318), 50 mg of sorbitan monostearate surfactant (Span 60), 10 mg of atrazine and 30 mL of acetone) and an aqueous phase (composed of 60 mg of polysorbate 80 (Tween 80) and 30 mL of deionized water). The resulting suspension was maintained under magnetic stirring for 10 minutes. After this, the acetone was evaporated under reduced pressure using a rotary evaporator to a final volume of 10 mL. Thus, the concentration of herbicide was 1 mg mL<sup>-1</sup>, and it was stored in amber flasks at room temperature (25 °C).

## **S2. Release kinetics assays**

The kinetic experiments were designed to assess the release profiles of the herbicide ATZ from the NPATZs in water and soil. All measurements were the results of five replicates. The experiments were run under dilution sink conditions. The ATZ released in water was expressed as a percentage, and results plotted as a function of time (minutes). In addition, the semi-empirical Korsmeyer–Peppas model was applied to the herbicide release curves in order to identify the type of mechanism involved. The water experiment employed a system consisting of two compartments (donor and receptor), maintained under gentle agitation. A cellulose membrane (Spectrapore, with 1000 Da molecular exclusion pore size) separated the nano-pesticides (1 mL) in the donor compartment from the receptor compartment containing 50 mL of water (pH=7). The system was maintained under magnetic stirring (350 rpm) at 30 °C. Aliquots were withdrawn at different time intervals and then analyzed by Varian Cary 50 Spectrophotometer.

### S3. ATZ extraction and analysis

ATZ extraction from soil samples was carried out using the Navarro et al. (2000) procedure.<sup>2</sup> Briefly, ATZ was extracted by adding acetonitrile and dichloromethane to the soil, and sonicating the mixture. The suspensions were shaken mechanically in an Erlenmeyer flask for 2 h. The organic phase was filtered and evaporated to dryness. The residue was dissolved in acetone, and the solution was injected into an HPLC (Agilent 1100 series). 20 µl of sample was injected into a 4 by 250 mm Hypersil ODS column. We used acetonitrile/water as mobile phase at flow rate of 1 ml per minutes according to the method reported previously.<sup>3</sup>

### S4. Composition of plant culture media

- *Solution A*: 94.5 g  $\text{Ca}(\text{NO}_3)_2 \cdot 4\text{H}_2\text{O}$ , 60.7 g  $\text{KNO}_3$  dissolved in 1 L deionized water (100 times)
- *Solution B*: 49.3 g  $\text{MgSO}_4 \cdot 7\text{H}_2\text{O}$ , 11.5 g  $\text{NH}_4\text{H}_2\text{PO}_4$  powder dissolved in 1 L deionized water (100 times)
- *Solution C*: 0.1004 g  $\text{Mn}(\text{NO}_3)_2 \cdot 4\text{H}_2\text{O}$ , 0.119 g  $\text{Zn}(\text{NO}_3)_2 \cdot 6\text{H}_2\text{O}$ , 0.005 g  $\text{CuSO}_4 \cdot 5\text{H}_2\text{O}$ , 0.002 g  $\text{MoNa}_2\text{O}_4 \cdot 2\text{H}_2\text{O}$  dissolved in 1 L deionized water (400 times)
- *Solution D*: 0.07416 g  $\text{H}_2\text{BO}_3$  dissolved in 500 mL deionized water (800 times), dissolved in hot water.
- *Solution E*: 1.1122 g  $\text{FeSO}_4 \cdot 7\text{H}_2\text{O}$  dissolved in 500 mL deionized water (800 times)

The culture solution (pH was measured and adjusted at 6) is composed by adding 2.5 mL solution A, 2.5 mL solution B, 2.5 mL solution C, 1.25 mL solution D to one liter of deionized water.

## S5. Physicochemical properties of the soil used in this study

The physicochemical properties of the soil used in this study is reported in Table S1.

- The pH was determined according to the method reported by Slattery et al. (1999).<sup>4</sup>

The soil:water and soil:KCl ratio was 1:2.5 for both measurements.

- Organic carbon was analysed according to the method reported by Walkley and Black (1934).<sup>5</sup>

- The cation exchange capacity (CEC) and exchangeable cation content were determined according to the method reported by Hendershot and Duquette (1986).<sup>6</sup> Al, Ca, K, Mg and Na were extracted with 0.1 M BaCl<sub>2</sub>, and the concentrations were determined by Inductively Coupled Plasma Optical Emission Spectrometry (ICP-OES) (PerkinElmer Optima 4300 DV, PerkinElmer, Waltham, MA, USA).

- The total metal contents were extracted with a mixture of HNO<sub>3</sub> and HCl (1:3 v/v) in Teflon reactors under 10 bar, 180 °C and 35 min as operational conditions of the microwave oven. The concentration in the extracts was determined by ICP-OES as above.

**Table S1.** Soil characteristics (standard error)

|                   | Units                                | Soil          |
|-------------------|--------------------------------------|---------------|
| pH <sub>H2O</sub> | -                                    | 8.35 (0.04)   |
| pH <sub>KCl</sub> | -                                    | 7.43 (0.04)   |
| Organic C         | %                                    | 2.16 (0.09)   |
| CEC               |                                      | 0.386 (0.009) |
| Na <sup>+</sup>   |                                      | 0.054 (0.001) |
| K <sup>+</sup>    | cmol <sup>(+)</sup> kg <sup>-1</sup> | 0.032 (0.001) |
| Ca <sup>2+</sup>  |                                      | 0.062 (0.001) |
| Mg <sup>2+</sup>  |                                      | 0.102 (0.002) |
| Al <sup>3+</sup>  |                                      | 0.137 (0.003) |
| Element           | Total concentration                  |               |
| As                |                                      | udl           |
| Cd                |                                      | udl           |
| Co                |                                      | udl           |
| Cr                |                                      | 1.41 (0.24)   |
| Cu                |                                      | 2.24 (0.03)   |
| Fe                | mg kg <sup>-1</sup>                  | 8284 (435)    |
| Mn                |                                      | 172.91 (5.84) |
| Ni                |                                      | 30.53 (10.61) |
| Pb                |                                      | udl           |
| Ti                |                                      | 357.7 (23.6)  |
| Zn                |                                      | 8.97 (1.48)   |

CEC: Cation Exchange Capacity, udl: under detection limit

## S6. Experimental design

The ATZ was dissolved in 5 ml acetone and further diluted to 50 ml using Milli-Q (MQ) water. To spike the soil, 15 ml of the ATZ or NPATZ suspensions were carefully and homogeneously dropped into the soil to reach a final concentration of 0.3, 1.5, or 3 mg per kg soil. The exposure to ATZ and NPATZ at each concentration was performed with three repetitive exposure durations separated by a two-week interval (week 2, 4 and 6 after exposure), representing a short-term, medium and long-term exposure scenario.<sup>7</sup> Control experiments were also performed similarly, however without exposure to ATZ or NPATZ. Another control experiment was carried out by exposing the plant samples to soil containing only the polymeric carriers (PNC) without the active ingredient (ATZ) at 1.5 mg kg<sup>-1</sup> soil. In total eight treatments in triplicate with three exposure durations were set up, which resulted in 72 pots with three individuals planted in each pot. The plants were watered every two days and 10 mL of 1/4 Hoagland solution was added into the pots once a week. Plants and the associated rhizosphere soils in each pot were harvested after 2, 4 and 6 weeks. The soil loosely adhering to the plant roots were discarded by vigorous shaking the roots. The soil that was tightly adhered to the plant roots were collected as rhizosphere soils. All the experiments including the pre-growth of seedlings were performed in a climate room at a 20/16 °C day/night temperature and 60% relative humidity set to a 16 h photoperiod until the associated rhizosphere soils were collected.

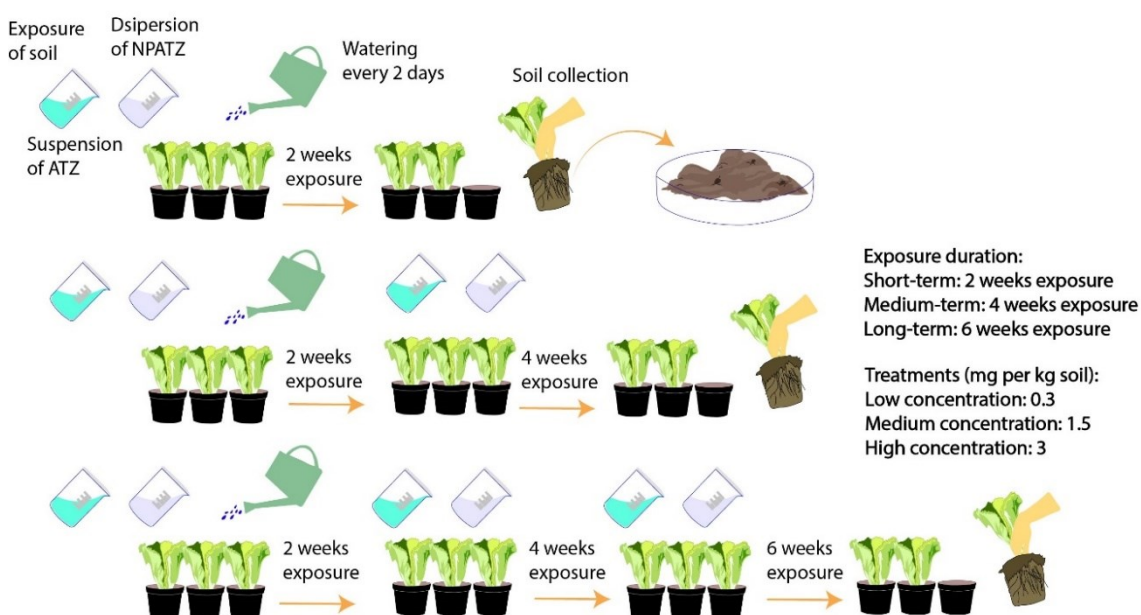

**Figure S1. Schematic illustration of the experimental set-up.** The soil was spiked with atrazine (ATZ) and ATZ nano-pesticides (NPATZ) and used to expose the *L. sativa* rhizosphere (3 replicates and 7 plants per treatment) at nominal concentrations of 0.3, 1.5 and 3 mg kg<sup>-1</sup> soil for short-term (2 weeks), medium-term (4 weeks) and long-term (6 weeks) exposure. In the short-term exposure, the plants were exposed once at the beginning of the exposure experiment and harvested after 2 weeks. For the medium-term exposure, the plants were exposed at the beginning and after two weeks. The plant's rhizospheres were harvested after 4 weeks. For the long-term exposure, the plants were exposed at the beginning, after 2 weeks and after 4 weeks. The plant's rhizospheres were harvested after 6 weeks of exposure. The plants were watered every two days in all treatments. Control experiments in which the plants were exposed to water or to polymeric carriers without ATZ were also performed.

## S7. DNA concentration

**Table S2.** Concentration of DNA extractions in each sample.

| Time                 | Treatments | Sample name | DNA concentration (ng/μl) |
|----------------------|------------|-------------|---------------------------|
| Short-term exposure  | CK         | Y19070801   | 24.8                      |
|                      |            | Y19070802   | 19.9                      |
|                      |            | Y19070803   | 18.3                      |
|                      | ATZ_L      | Y19070804   | 22.0                      |
|                      |            | Y19070805   | 40.5                      |
|                      |            | Y19070806   | 17.3                      |
|                      | ATZ_M      | Y19070807   | 25.8                      |
|                      |            | Y19070808   | 51.6                      |
|                      |            | Y19070809   | 45.9                      |
|                      | ATZ_H      | Y19070810   | 69.2                      |
|                      |            | Y19070811   | 54.4                      |
|                      |            | Y19070812   | 19.7                      |
|                      | PNC        | Y19070813   | 25.8                      |
|                      |            | Y19070814   | 36.2                      |
|                      |            | Y19070815   | 19.8                      |
|                      | NPATZ_L    | Y19070816   | 35.4                      |
|                      |            | Y19070817   | 22.4                      |
|                      |            | Y19070818   | 19.7                      |
|                      | NPATZ_M    | Y19070819   | 19.6                      |
|                      |            | Y19070820   | 29.4                      |
|                      |            | Y19070821   | 12.4                      |
|                      | NPATZ_H    | Y19070822   | 43.0                      |
|                      |            | Y19070823   | 16.1                      |
|                      |            | Y19070824   | 27.8                      |
| Medium-term exposure | CK         | Y19070825   | 14.5                      |
|                      |            | Y19070826   | 19.2                      |
|                      |            | Y19070827   | 23.8                      |
|                      | ATZ_L      | Y19070828   | 15.9                      |
|                      |            | Y19070829   | 18.7                      |
|                      |            | Y19070830   | 23.5                      |
|                      | ATZ_M      | Y19070831   | 22.2                      |

|                    |           |           |      |
|--------------------|-----------|-----------|------|
|                    | ATZ_H     | Y19070832 | 32.2 |
|                    |           | Y19070833 | 24.1 |
|                    |           | Y19070834 | 16.0 |
|                    |           | Y19070835 | 44.4 |
|                    |           | Y19070836 | 28.3 |
|                    | PNC       | Y19070837 | 24.0 |
|                    |           | Y19070838 | 28.8 |
|                    |           | Y19070839 | 14.6 |
|                    | NPATZ_L   | Y19070840 | 9.6  |
|                    |           | Y19070841 | 13.8 |
|                    |           | Y19070842 | 15.2 |
|                    | NPATZ_M   | Y19070843 | 33.2 |
|                    |           | Y19070844 | 17.6 |
|                    |           | Y19070845 | 14.7 |
|                    | NPATZ_H   | Y19070846 | 22.4 |
| Y19070847          |           | 20.0      |      |
| Y19070848          |           | 28.0      |      |
| Long-term exposure | CK        | Y19070849 | 58.3 |
|                    |           | Y19070850 | 33.7 |
|                    |           | Y19070851 | 38.9 |
|                    | ATZ_L     | Y19070852 | 34.8 |
|                    |           | Y19070853 | 42.6 |
|                    |           | Y19070854 | 50.2 |
|                    | ATZ_M     | Y19070855 | 51.3 |
|                    |           | Y19070856 | 49.3 |
|                    |           | Y19070857 | 52.5 |
|                    | ATZ_H     | Y19070858 | 46.1 |
|                    |           | Y19070859 | 48.8 |
|                    |           | Y19070860 | 38.8 |
|                    | PNC       | Y19070861 | 35.9 |
|                    |           | Y19070862 | 48.4 |
|                    |           | Y19070863 | 51.9 |
|                    | NPATZ_L   | Y19070864 | 47.4 |
|                    |           | Y19070865 | 63.6 |
|                    |           | Y19070866 | 59.4 |
|                    | NPATZ_M   | Y19070867 | 58.6 |
|                    |           | Y19070868 | 47.5 |
|                    |           | Y19070869 | 42.4 |
| NPATZ_H            | Y19070870 | 69.6      |      |
|                    | Y19070871 | 69.6      |      |
|                    | Y19070872 | 69.2      |      |

**Table S3.** Sample details of each sequencing library submitted to NCBI database.

| Time                 | Treatments | Sample_name | Biosample_accession | Accession   |
|----------------------|------------|-------------|---------------------|-------------|
| Short-term exposure  | CK         | Y19070801   | SAMN14271685        | SRR11236976 |
|                      |            | Y19070802   | SAMN14271686        | SRR11236975 |
|                      |            | Y19070803   | SAMN14271687        | SRR11236964 |
|                      | ATZ_L      | Y19070804   | SAMN14271688        | SRR11236953 |
|                      |            | Y19070805   | SAMN14271689        | SRR11236942 |
|                      |            | Y19070806   | SAMN14271690        | SRR11236931 |
|                      | ATZ_M      | Y19070807   | SAMN14271691        | SRR11236920 |
|                      |            | Y19070808   | SAMN14271692        | SRR11236909 |
|                      |            | Y19070809   | SAMN14271693        | SRR11236906 |
|                      | ATZ_H      | Y19070810   | SAMN14271694        | SRR11236905 |
|                      |            | Y19070811   | SAMN14271695        | SRR11236974 |
|                      |            | Y19070812   | SAMN14271696        | SRR11236973 |
|                      | PNC        | Y19070813   | SAMN14271697        | SRR11236972 |
|                      |            | Y19070814   | SAMN14271698        | SRR11236971 |
|                      |            | Y19070815   | SAMN14271699        | SRR11236970 |
|                      | NPATZ_L    | Y19070816   | SAMN14271700        | SRR11236969 |
|                      |            | Y19070817   | SAMN14271701        | SRR11236968 |
|                      |            | Y19070818   | SAMN14271702        | SRR11236967 |
|                      | NPATZ_M    | Y19070819   | SAMN14271703        | SRR11236966 |
|                      |            | Y19070820   | SAMN14271704        | SRR11236965 |
|                      |            | Y19070821   | SAMN14271705        | SRR11236963 |
| Medium-term exposure | CK         | Y19070822   | SAMN14271706        | SRR11236962 |
|                      |            | Y19070823   | SAMN14271707        | SRR11236961 |
|                      |            | Y19070824   | SAMN14271708        | SRR11236960 |
|                      | ATZ_L      | Y19070825   | SAMN14271709        | SRR11236959 |
|                      |            | Y19070826   | SAMN14271710        | SRR11236958 |
|                      |            | Y19070827   | SAMN14271711        | SRR11236957 |
|                      | ATZ_M      | Y19070828   | SAMN14271712        | SRR11236956 |
|                      |            | Y19070829   | SAMN14271713        | SRR11236955 |
|                      |            | Y19070830   | SAMN14271714        | SRR11236954 |
|                      | ATZ_H      | Y19070831   | SAMN14271715        | SRR11236952 |
|                      |            | Y19070832   | SAMN14271716        | SRR11236951 |
|                      |            | Y19070833   | SAMN14271717        | SRR11236950 |
|                      | PNC        | Y19070834   | SAMN14271718        | SRR11236949 |
|                      |            | Y19070835   | SAMN14271719        | SRR11236948 |
|                      |            | Y19070836   | SAMN14271720        | SRR11236947 |
|                      | NPATZ_L    | Y19070837   | SAMN14271721        | SRR11236946 |
|                      |            | Y19070838   | SAMN14271722        | SRR11236945 |
|                      |            | Y19070839   | SAMN14271723        | SRR11236944 |
|                      | NPATZ_M    | Y19070840   | SAMN14271724        | SRR11236943 |
|                      |            | Y19070841   | SAMN14271725        | SRR11236941 |
|                      |            | Y19070842   | SAMN14271726        | SRR11236940 |
| Long-term exposure   | CK         | Y19070843   | SAMN14271727        | SRR11236939 |
|                      |            | Y19070844   | SAMN14271728        | SRR11236938 |
|                      |            | Y19070845   | SAMN14271729        | SRR11236937 |
|                      | ATZ_L      | Y19070846   | SAMN14271730        | SRR11236936 |
|                      |            | Y19070847   | SAMN14271731        | SRR11236935 |

|  |         |           |              |             |
|--|---------|-----------|--------------|-------------|
|  | ATZ_M   | Y19070854 | SAMN14271738 | SRR11236927 |
|  |         | Y19070855 | SAMN14271739 | SRR11236926 |
|  |         | Y19070856 | SAMN14271740 | SRR11236925 |
|  |         | Y19070857 | SAMN14271741 | SRR11236924 |
|  | ATZ_H   | Y19070858 | SAMN14271742 | SRR11236923 |
|  |         | Y19070859 | SAMN14271743 | SRR11236922 |
|  |         | Y19070860 | SAMN14271744 | SRR11236921 |
|  | NP      | Y19070861 | SAMN14271745 | SRR11236919 |
|  |         | Y19070862 | SAMN14271746 | SRR11236918 |
|  |         | Y19070863 | SAMN14271747 | SRR11236917 |
|  | NPATZ_L | Y19070864 | SAMN14271748 | SRR11236916 |
|  |         | Y19070865 | SAMN14271749 | SRR11236915 |
|  |         | Y19070866 | SAMN14271750 | SRR11236914 |
|  | NPATZ_M | Y19070867 | SAMN14271751 | SRR11236913 |
|  |         | Y19070868 | SAMN14271752 | SRR11236912 |
|  |         | Y19070869 | SAMN14271753 | SRR11236911 |
|  | NPATZ_H | Y19070870 | SAMN14271754 | SRR11236910 |
|  |         | Y19070871 | SAMN14271755 | SRR11236908 |
|  |         | Y19070872 | SAMN14271756 | SRR11236907 |

## S8. Data analysis

Quality control was performed by filtering the chimeras, singletons, chloroplasts, mitochondria, archaea and eukaryotes. The sampling depth heterogeneity was corrected by performing rarefaction. Qualified sequences were clustered into Operational Taxonomic Units (OTUs) based on the 97% sequence similarity level.<sup>8</sup> The taxonomic assignment was conducted using the UCLUST consensus taxonomy classifier. Sequences were aligned with Python Nearest Alignment Space Termination (PyNAST) to build a phylogenetic tree. QIIME then assembled a table of OTU abundances in each sample with taxonomic identifiers for each OTU. The core OTUs were selected based on the NCBI annotated ATZ-degrading bacterial genera, with presence in 100% of all the replicates for each treatment. Afterwards, phylogenetic investigation of communities by reconstruction of unobserved states (PICRUSt)<sup>9</sup> was used to translate the 16S rRNA gene amplicon data sets into predicted metagenomes to predict the functional capabilities of bacterial communities (PICRUSt v1.0.0 pipeline in QIIME). The predicted metagenomes were further annotated using Kyoto Encyclopedia of Genes and Genomes (KEGG) pathways.<sup>10</sup> The core functional genes were selected based on the KEGG pathway of ATZ degradation, with presence in 100% of all the replicates for each treatment. The correlation between the core OTUs and functional genes was assessed

based on person correlation analysis with significance  $p < 0.05$ . Analyses were conducted using R v3.3.2, Paleontological Statistics (PAST, v3.14), and Statistical Analysis of Metagenomic Profiles (STAMP, v2.1.3).

#### **S9. Spiking the soil with ATZ and NPATZ**

The ATZ was dissolved in 5 ml acetone and further diluted to 50 ml using Milli-Q (MQ) water. An aliquot of the NPATZ was dispersed in MQ water and was used as 1 g L<sup>-1</sup> stock dispersion. Spiked soil samples were prepared by carefully dropping the dispersion of NPATZ or solution of ATZ into soil surface to reach a final concentration of 1 mg per kg soil. The soil was homogenized by thoroughly mixing the soil for 20 minutes at room temperature.

#### **S10. Bacterial genera and functional genes associated with ATZ and NPATZ degradation**

The bacterial genera and functional genes involved in the degradation pathways of ATZ and NPATZ are given in Figure S2. For short-term exposure, *Pseudomonas* and *Mycobacterium* and functional genes of *atzB*, *atzC*, *atzD*, *atzE* and *atzF* were involved in both ATZ and NPATZ degradation from hydroxyatrazine to CO<sub>2</sub>. As the exposure time increased to medium-term exposure, the degradation of ATZ and NPATZ differentiated with each other at the stage of degradation from carboxybiuret to CO<sub>2</sub> (*atzE* and *atzF* were mainly used by *Pseudomonas* and *Acetobacter* for ATZ degradation, and *Janthinobacterium*, *Mycobacterium* and *Arthrobacter* for NPATZ degradation). After long-term exposure, the ATZ degradation pathway is different from NPATZ degradation pathway, with more bacterial genera involved in the processes from N-isopropylammelide to carboxybiuret of NPATZ degradation pathway.

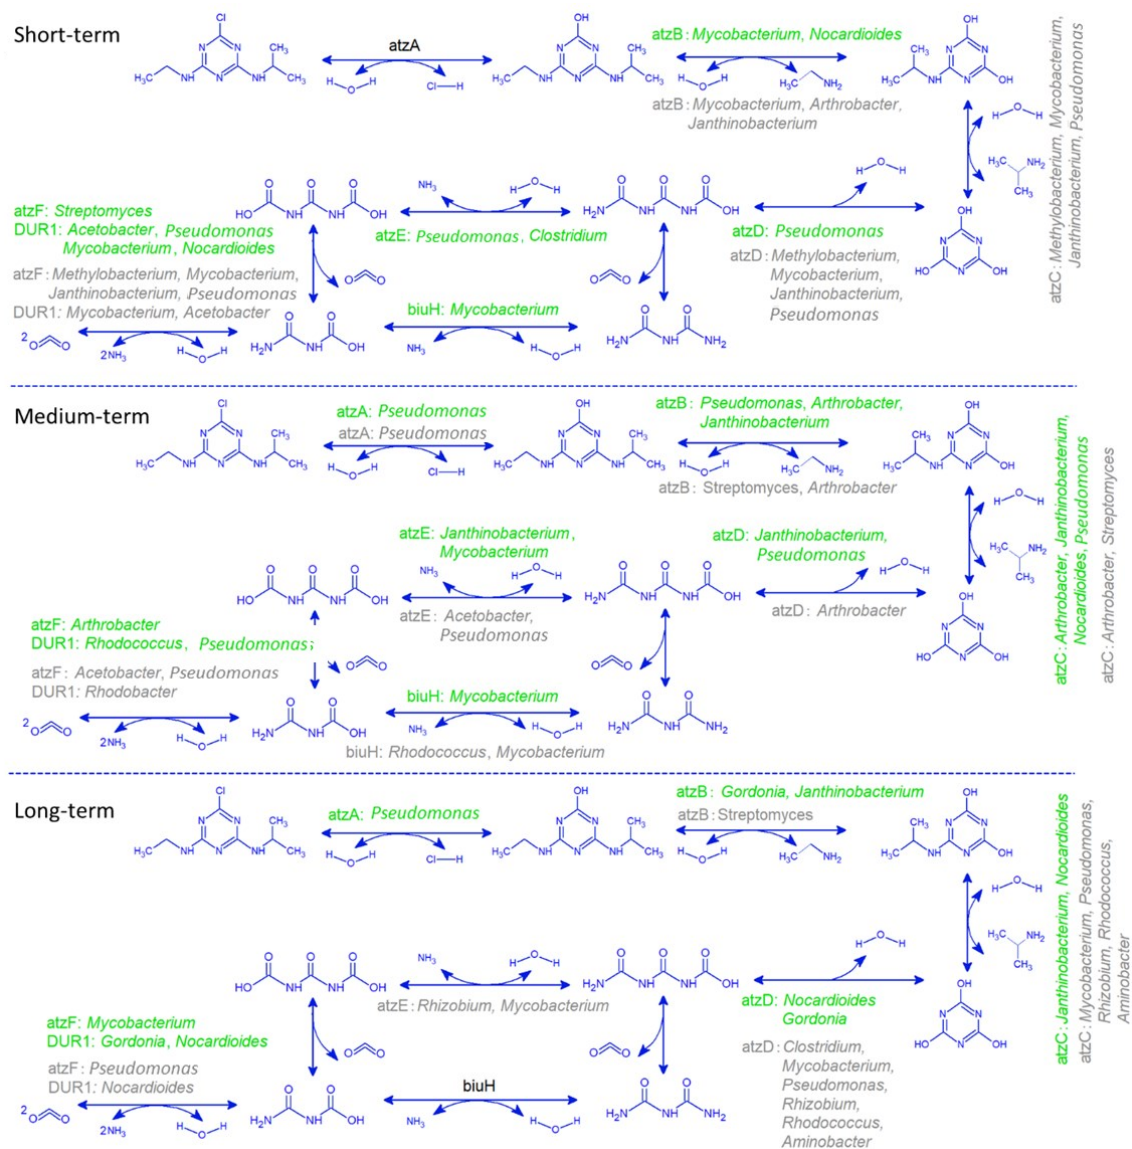

**Figure S2. Bacterial genera and functional genes related with ATZ and NPTAZ degradation.** Bacterial genera and functional genes in green are related with ATZ degradation. Bacterial genera and functional genes in grey are related with NPATZ degradation. Functional genes in black represent no significant positive correlation with bacterial genera.

## References

1. Grillo, R.; dos Santos, N. Z. P.; Maruyama, C. R.; Rosa, A. H.; de Lima, R.; Fraceto, L. F., *Poly( $\epsilon$ -caprolactone)nanocapsules as carrier systems for herbicides: Physico-chemical characterization and genotoxicity evaluation. Journal of Hazardous Materials* **2012**, 231-232, 1-9.
2. Moreno, J. L.; Aliaga, A.; Navarro, S.; Hernández, T.; García, C., *Effects of atrazine on microbial activity in semiarid soil. Applied Soil Ecology* **2007**, 35 (1), 120-127.
3. Satapanajaru, T.; Anurakpongsatorn, P.; Pengthamkeerati, P.; Boparai, H., *Remediation of Atrazine-contaminated Soil and Water by Nano Zerovalent Iron. Water, Air, and Soil Pollution* **2008**, 192 (1), 349-359.
4. *Soil Analysis: An Interpretation Manual*. 1999; p 388.
5. Walkley, A.; Black, I. A., *An examination of the Degtjareff method for determining soil organic matter, and a proposed modification of the chromic acid titration method. Soil Science* **1934**, 37 (1).
6. Hendershot, W. H.; Duquette, M., *A simple barium chloride method for determining cation exchange capacity and exchangeable cations. Soil Science Society of America Journal* **1986**, 50 (3), 605-608.
7. Zhai, Y.; Hunting, E. R.; Liu, G.; Baas, E.; Peijnenburg, W. J.; Vijver, M. G., *Compositional alterations in soil bacterial communities exposed to TiO<sub>2</sub> nanoparticles are not reflected in functional impacts. Environmental research* **2019**, 178, 108713.
8. Liu, G.; Zhang, Y.; van der Mark, E.; Magic-Knezev, A.; Pinto, A.; van den Bogert, B.; Liu, W.; van der Meer, W.; Medema, G., *Assessing the origin of bacteria in tap water and distribution system in an unchlorinated drinking water system by SourceTracker using microbial community fingerprints. Water research* **2018**, 138, 86-96.
9. Langille, M. G.; Zaneveld, J.; Caporaso, J. G.; McDonald, D.; Knights, D.; Reyes, J. A.; Clemente, J. C.; Burkepille, D. E.; Thurber, R. L. V.; Knight, R., *Predictive functional profiling of microbial communities using 16S rRNA marker gene sequences. Nat. Biotechnol.* **2013**, 31 (9), 814.
10. Ballou, A. L.; Ali, R. A.; Mendoza, M. A.; Ellis, J.; Hassan, H. M.; Croom, W.; Koci, M. D., *Development of the chick microbiome: how early exposure influences future microbial diversity. Frontiers in veterinary science* **2016**, 3, 2.
